# Supplementary material
Source: PubMed Central journal article supplement (PMC7615053)

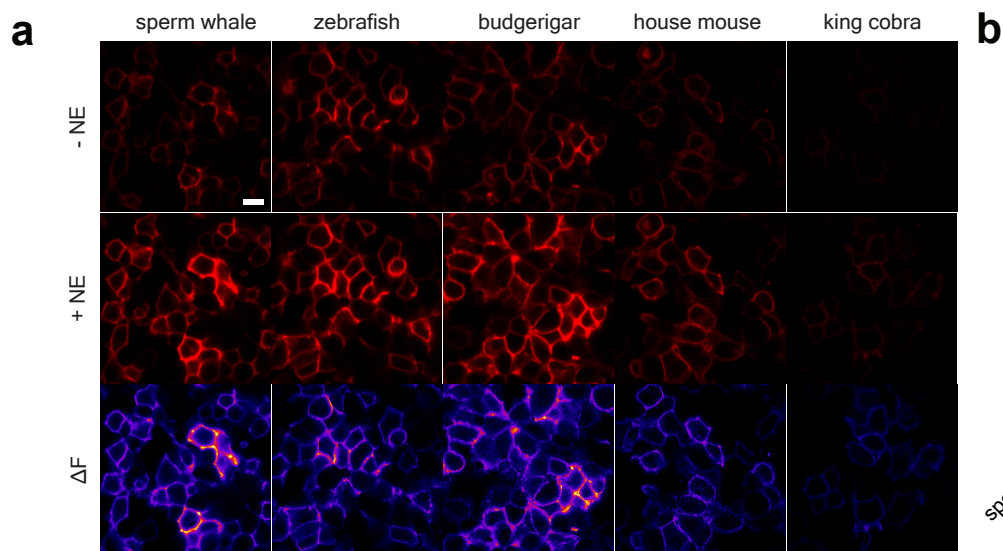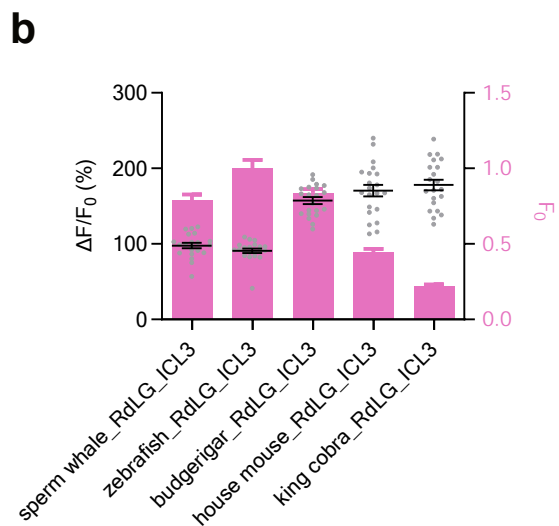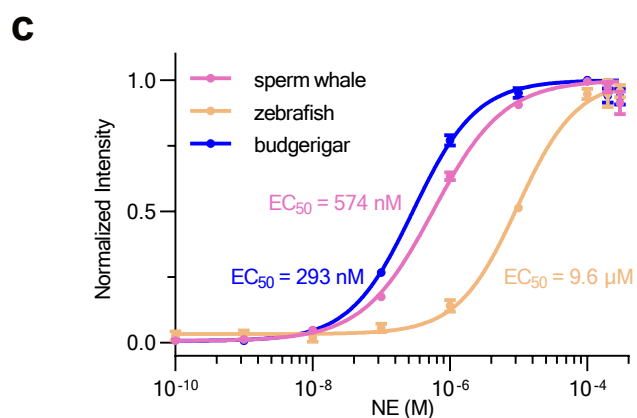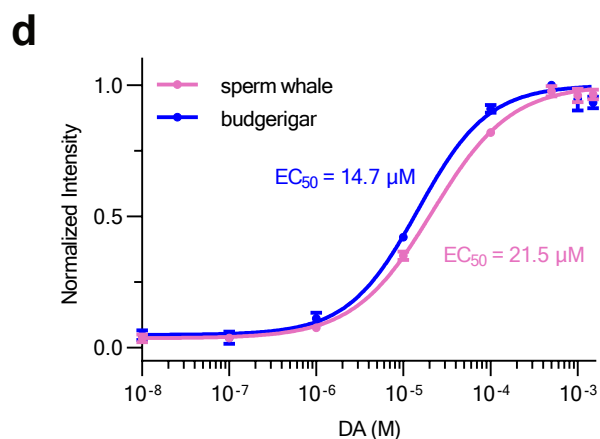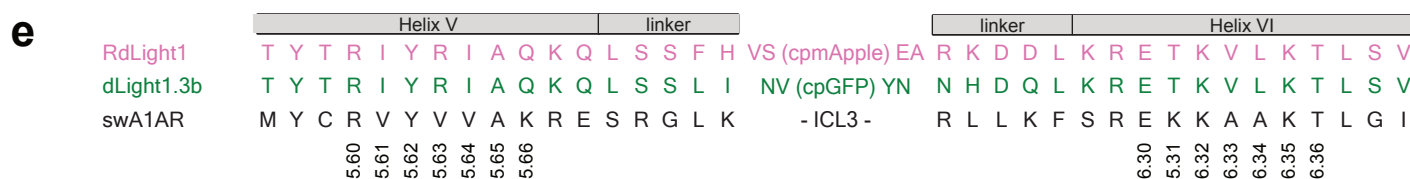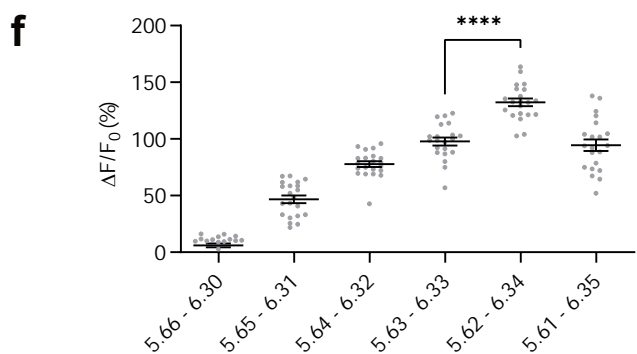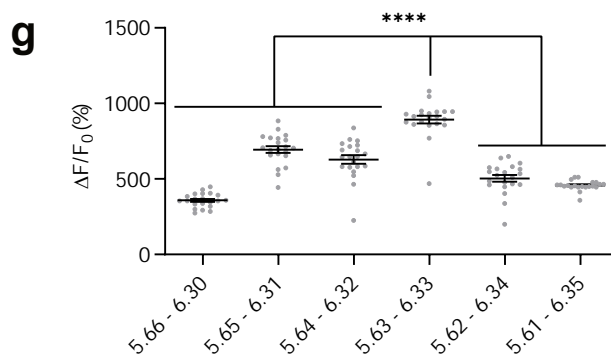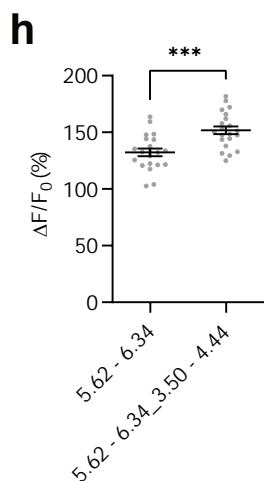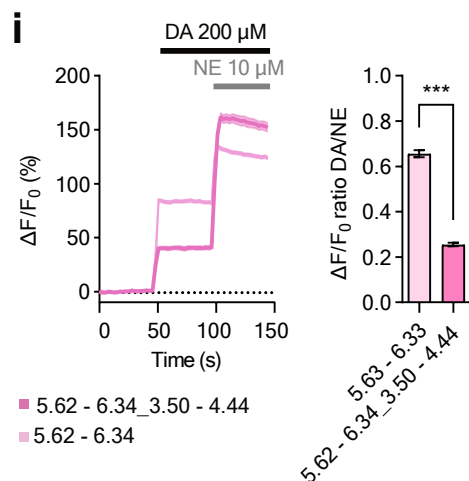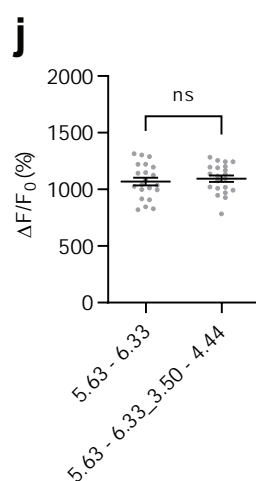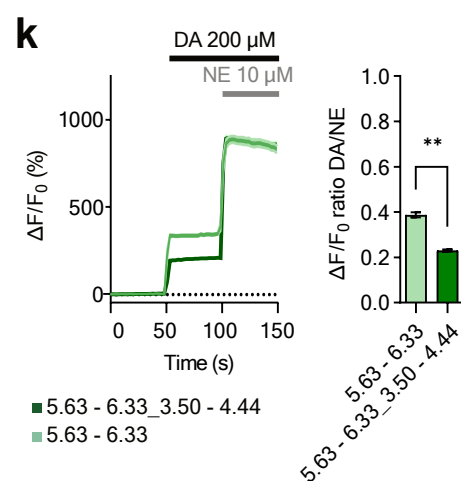

Supplement: EMS179669-supplement-Extended_Data_Fig_1.pdf [file EMS179669-supplement-Extended_Data_Fig_1.pdf]

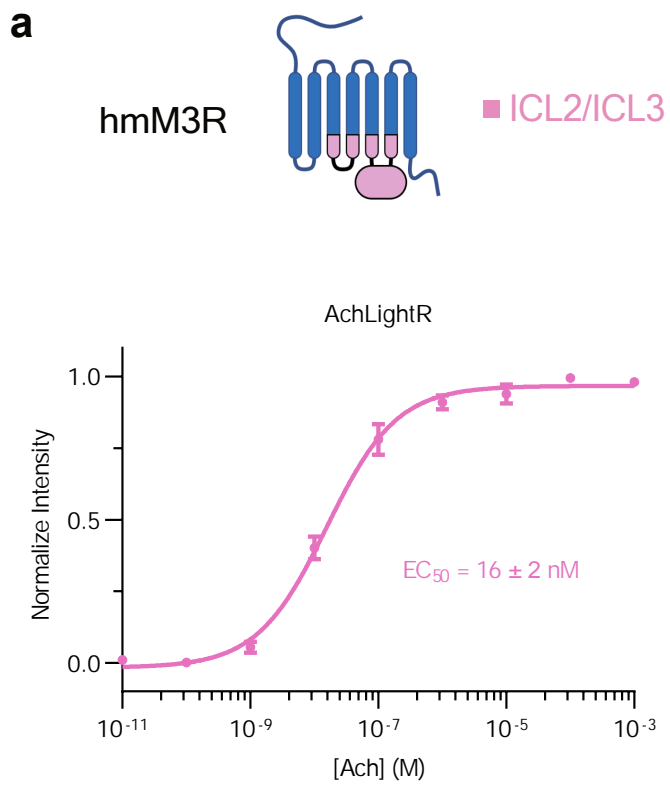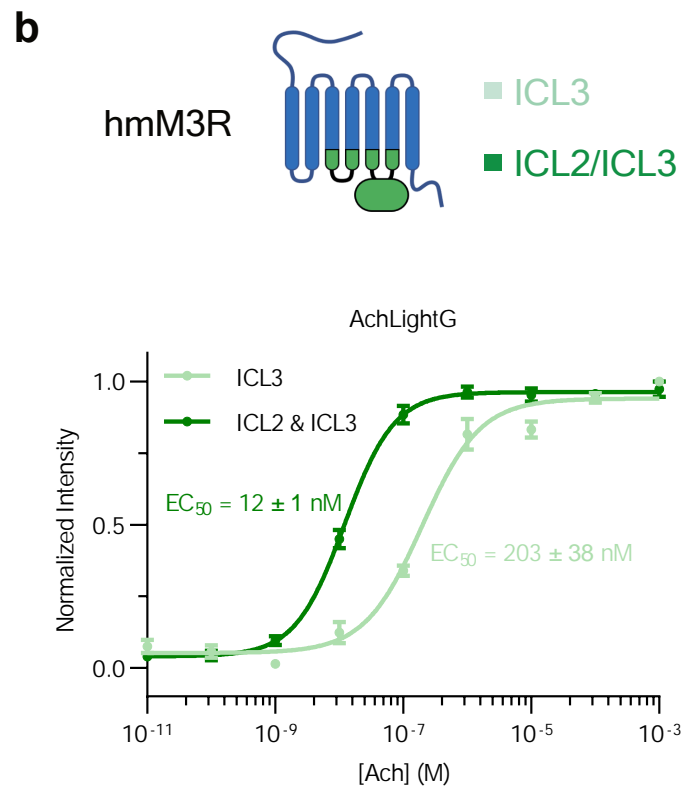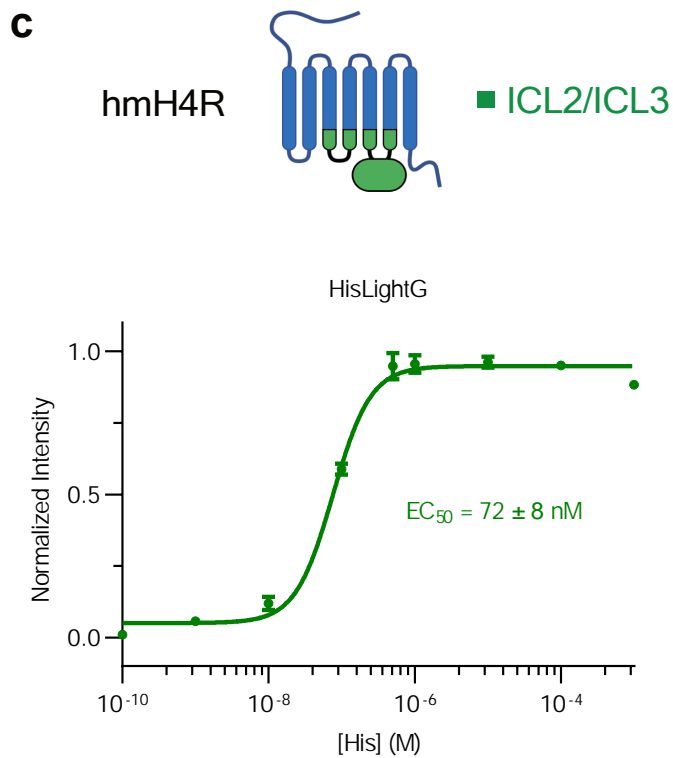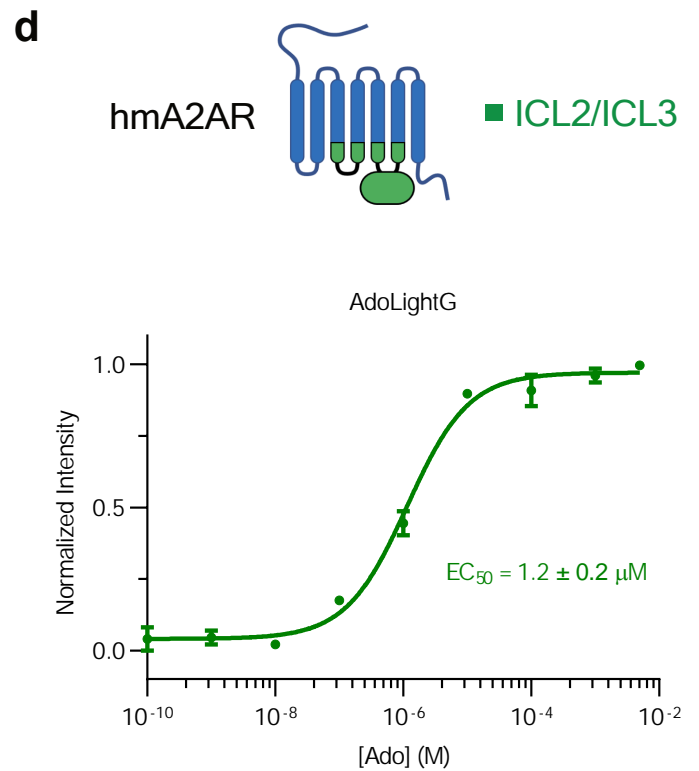

Supplement: EMS179669-supplement-Extended_Data_Fig_10.pdf [file EMS179669-supplement-Extended_Data_Fig_10.pdf]

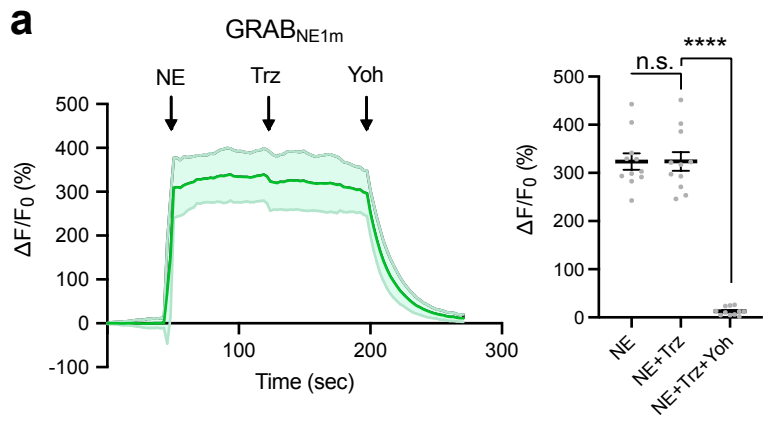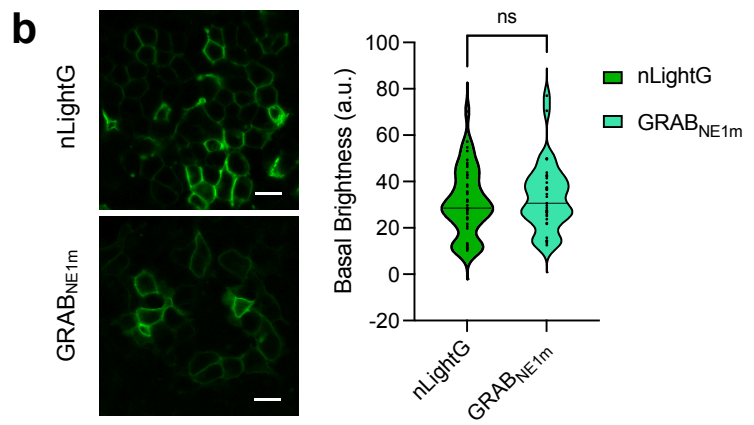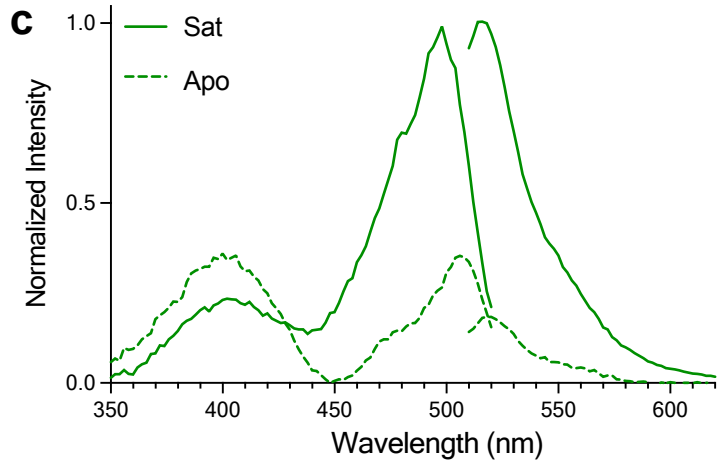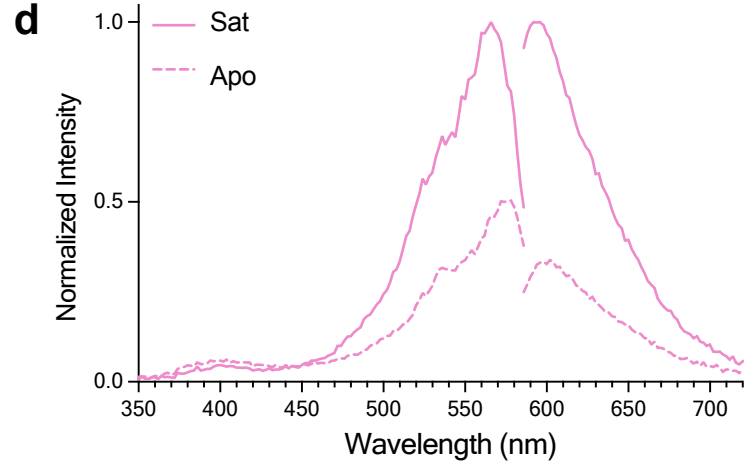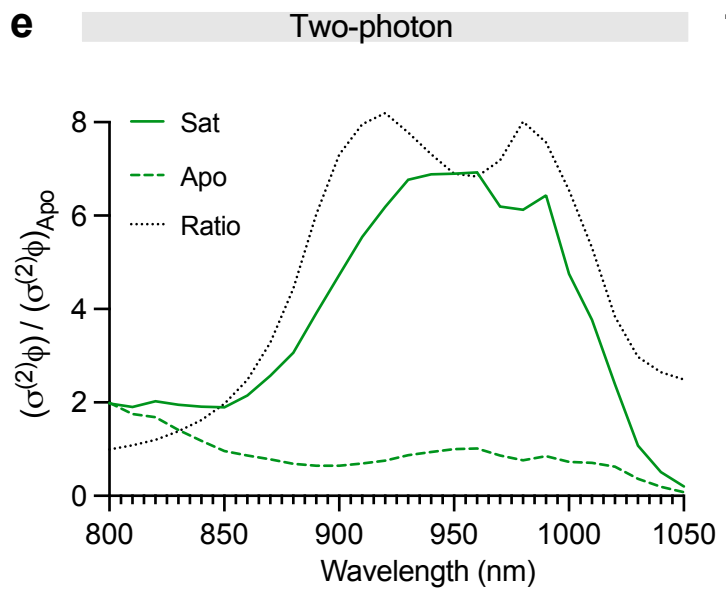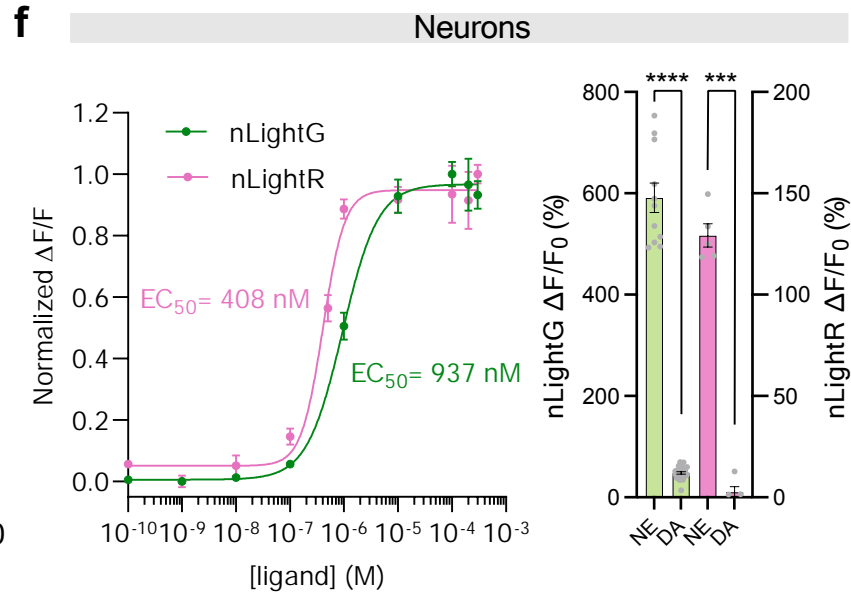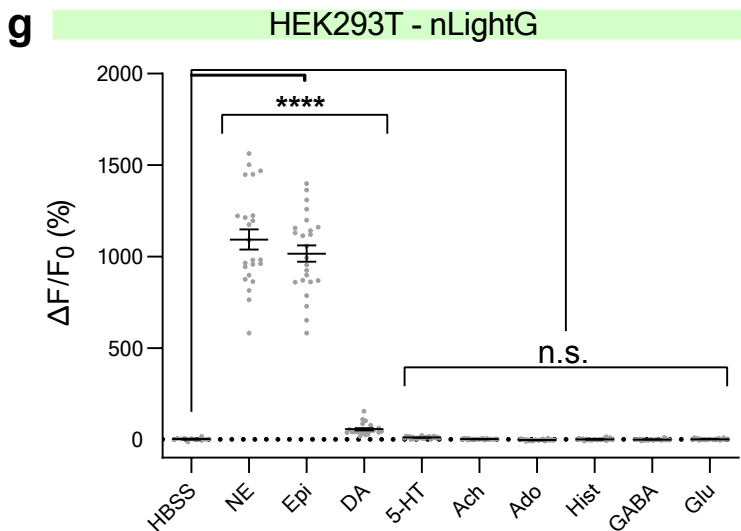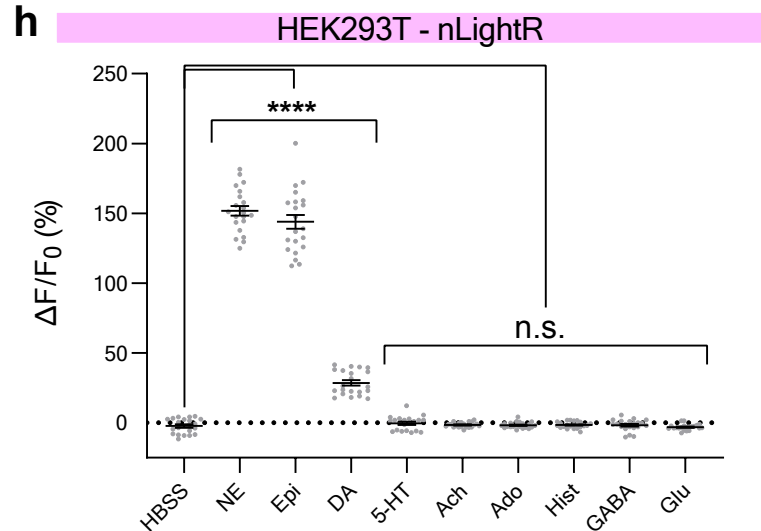

Supplement: EMS179669-supplement-Extended_Data_Fig_2.pdf [file EMS179669-supplement-Extended_Data_Fig_2.pdf]

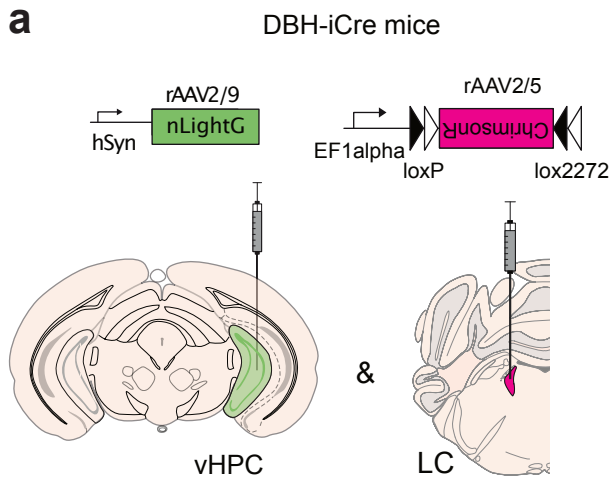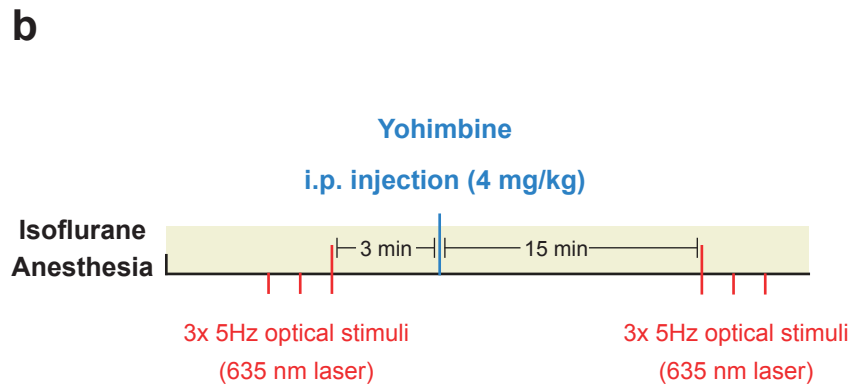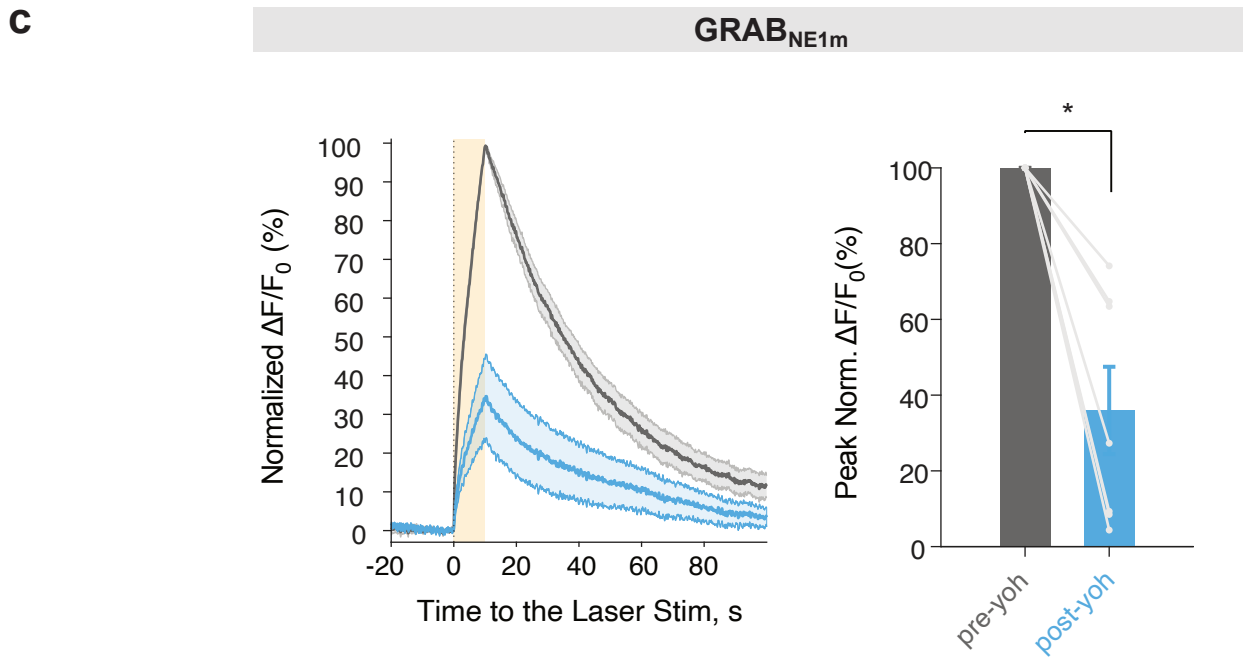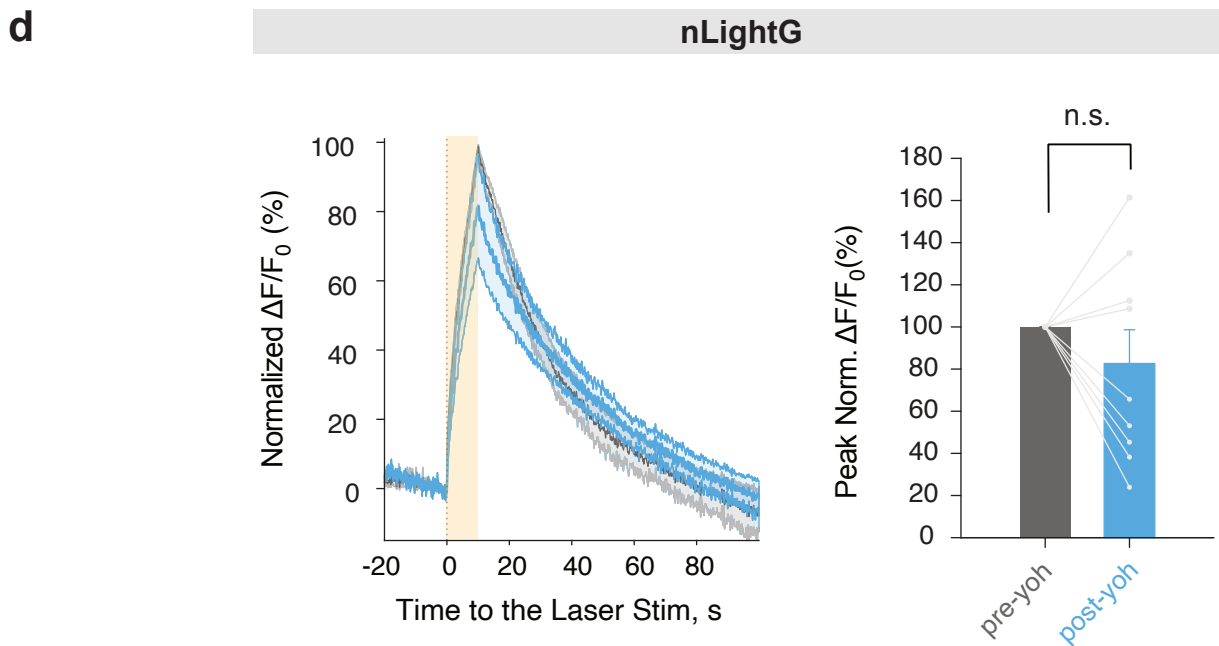

Supplement: EMS179669-supplement-Extended_Data_Fig_4.pdf [file EMS179669-supplement-Extended_Data_Fig_4.pdf]

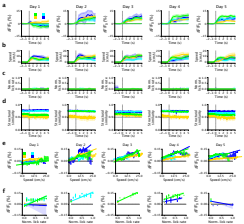

Supplement: EMS179669-supplement-Extended_Data_Fig_6.pdf [file EMS179669-supplement-Extended_Data_Fig_6.pdf]

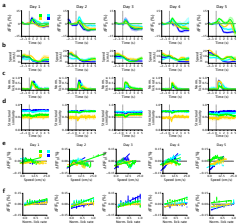

Supplement: EMS179669-supplement-Extended_Data_Fig_7.pdf [file EMS179669-supplement-Extended_Data_Fig_7.pdf]

**a**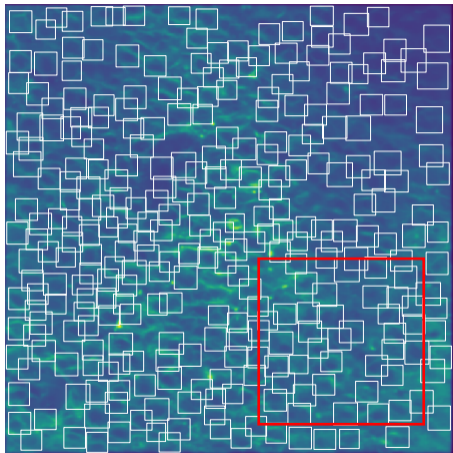**b**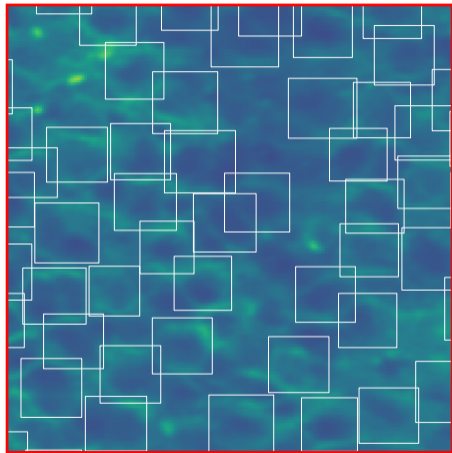 $F_{min}$  $F_{max}$

Supplement: EMS179669-supplement-Extended_Data_Fig_8.pdf [file EMS179669-supplement-Extended_Data_Fig_8.pdf]

**a**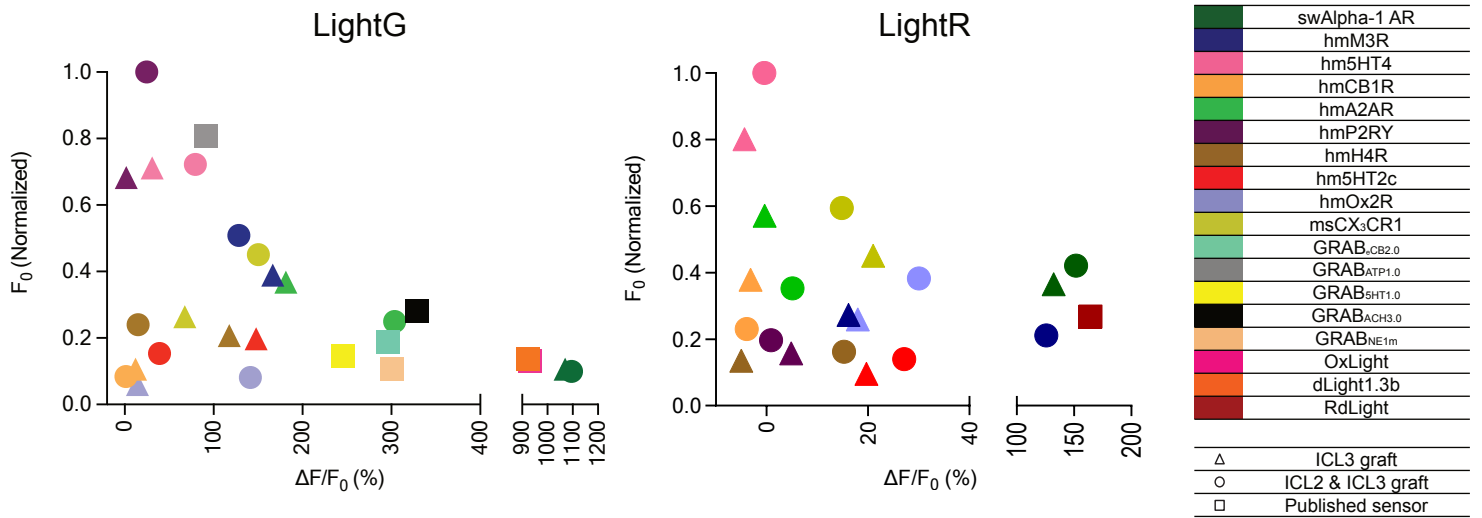**b**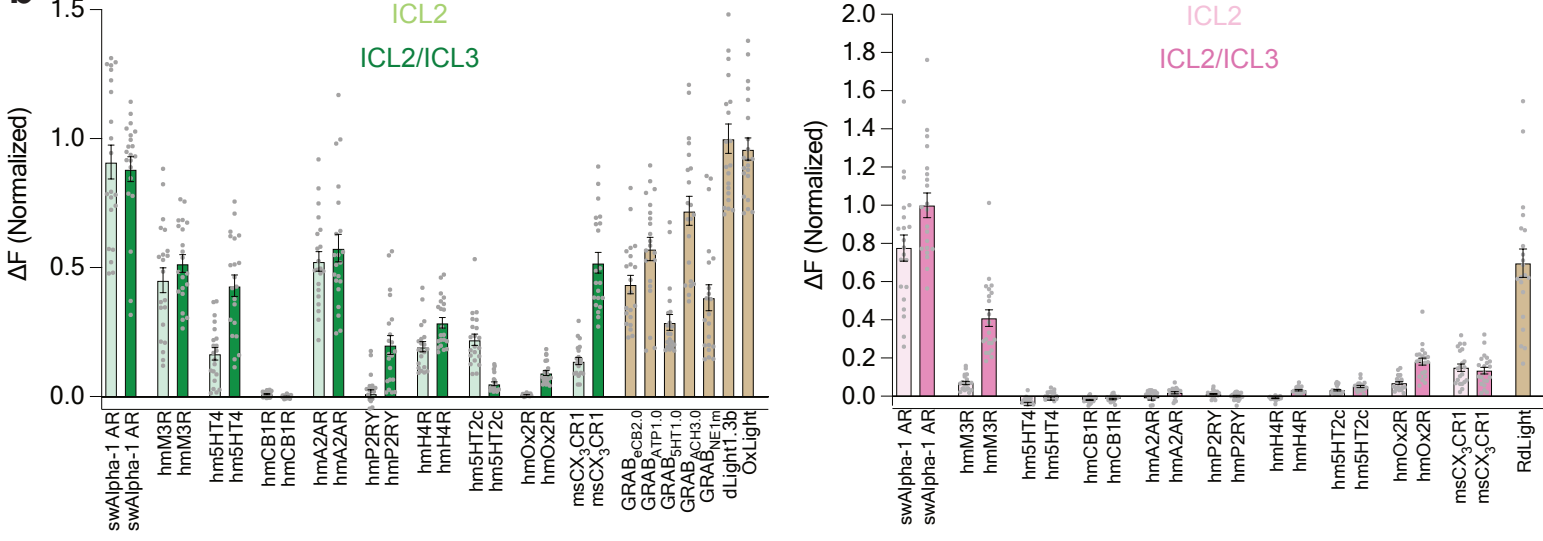**c**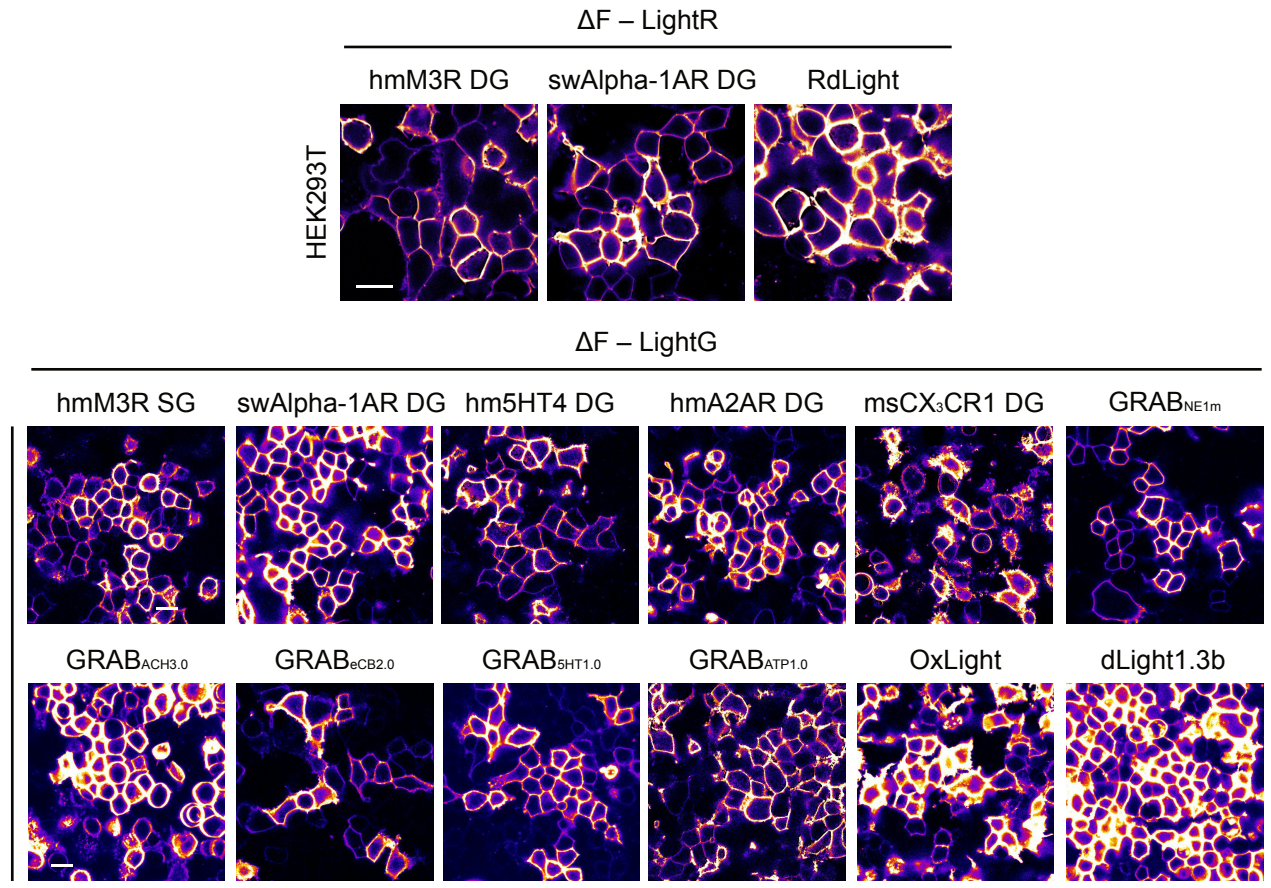

Supplement: EMS179669-supplement-Extended_Data_Fig_9.pdf [file EMS179669-supplement-Extended_Data_Fig_9.pdf]
